# Supplementary material for: Antinutritional factors in pearl millet grains: Phytate and goitrogens content variability and molecular characterization of genes involved in their pathways
Source: PLoS One. 2018 Jun 1;13(6):e0198394. doi: 10.1371/journal.pone.0198394 (PMC5983567; doi:10.1371/journal.pone.0198394)

PgICGT\_648  
PgICGT\_646  
ZmCGT  
OsCGT

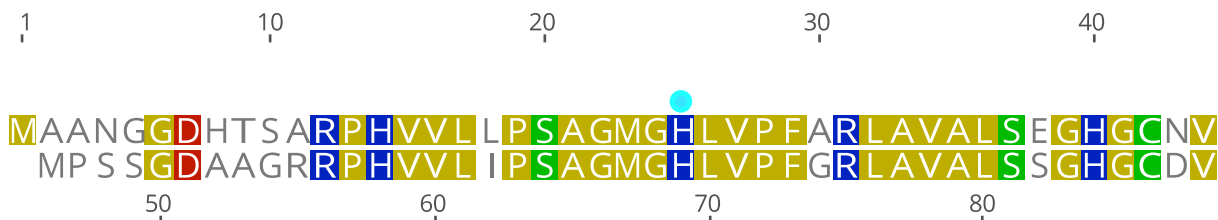

PgICGT\_648  
PgICGT\_646  
ZmCGT  
OsCGT

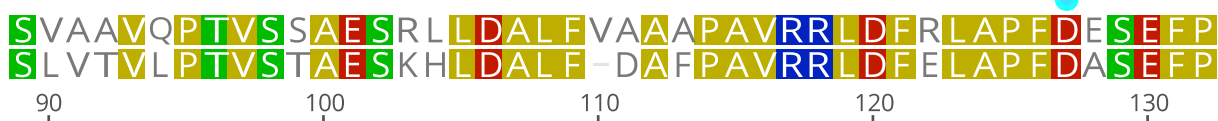

PgICGT\_648  
PgICGT\_646  
ZmCGT  
OsCGT

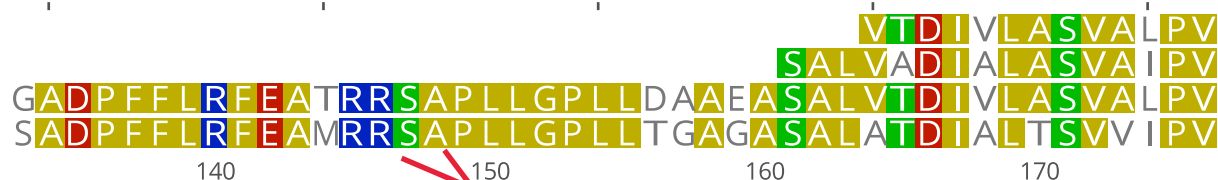

PgICGT\_648  
PgICGT\_646  
ZmCGT  
OsCGT

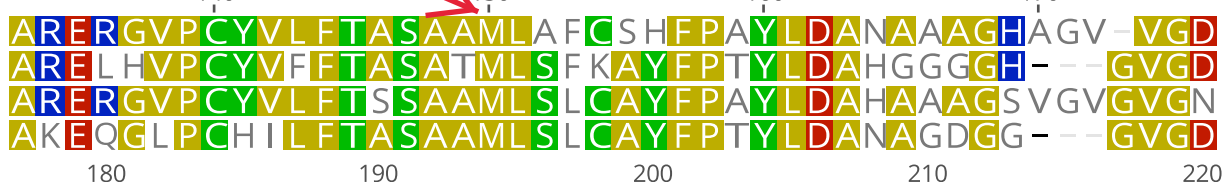

PgICGT\_648  
PgICGT\_646  
ZmCGT  
OsCGT

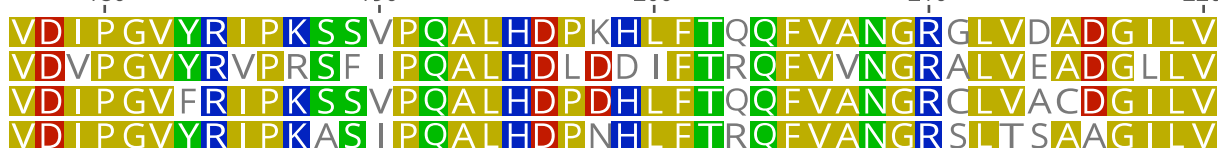

PgICGT\_648  
PgICGT\_646  
ZmCGT  
OsCGT

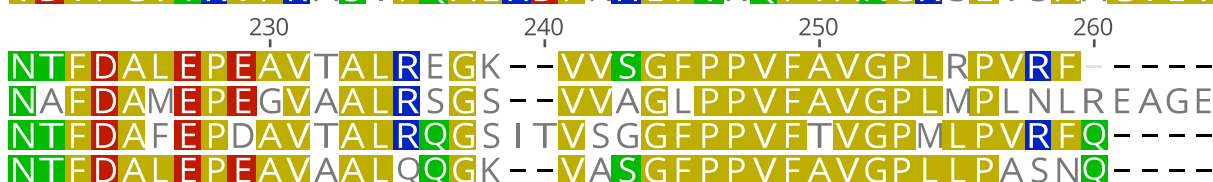

PgICGT\_648  
PgICGT\_646  
ZmCGT  
OsCGT

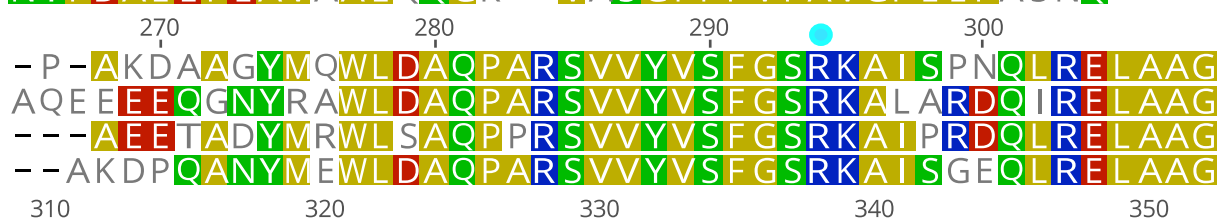

PgICGT\_648  
PgICGT\_646  
ZmCGT  
OsCGT

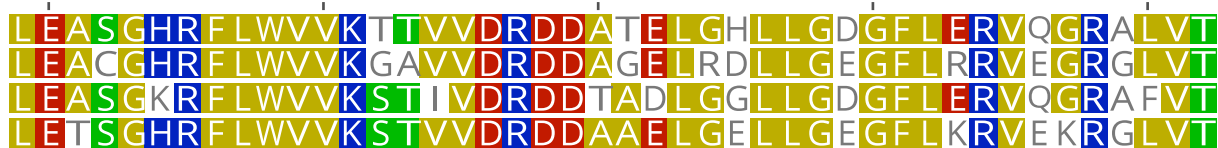

PgICGT\_648  
PgICGT\_646  
ZmCGT  
OsCGT

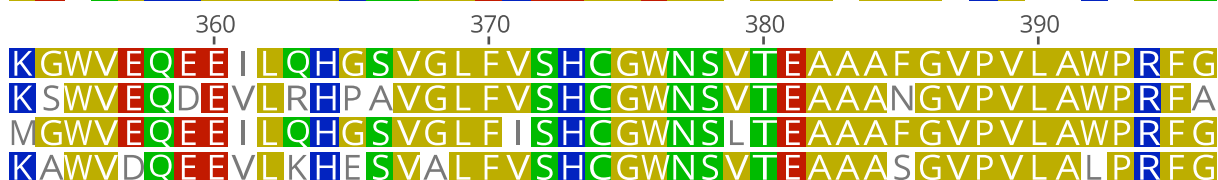

PgICGT\_648  
PgICGT\_646  
ZmCGT  
OsCGT

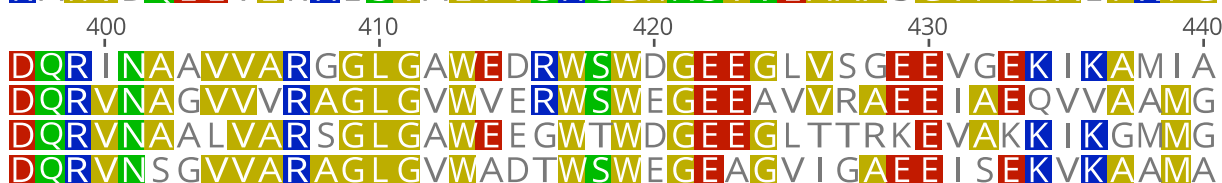

PgICGT\_648  
PgICGT\_646  
ZmCGT  
OsCGT

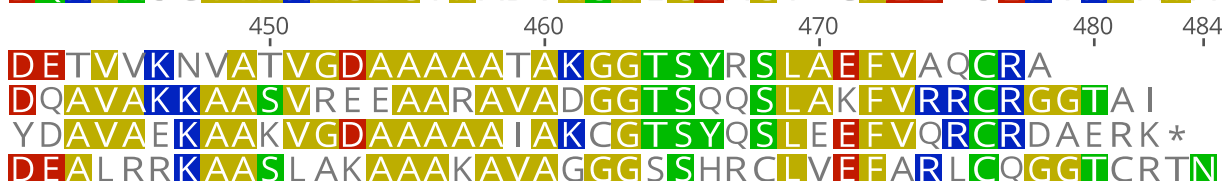

Supplement: S6 Fig — Multiple alignment of the deduced amino acid sequences of genes coding for CGT from pearl millet (PglCGT_646 and PglCGT_648) and other plant species (names are as in S2 Table). Red arrow indicates the start codon according to the CDS of PglCGT_646 and PglCGT_648 as reported in the annotated pearl millet genome. Blue dots indicate conserved amino acid residues within the N-terminal acceptor binding pocket. (PDF) [file pone.0198394.s011.pdf]
